# Supplementary material
Source: publisher site journal article supplement (https://www.dovepress.com/article/418969)
Supplement: Supplementary file 1 [file get_supplementary_file.php]

**Supplement**

**Table S1** PROVEAN of *B. cenocepacia* strain 1103 and strain MC0-3 in PenB

| Strain 1103 | | | Strain MC0-3 | | |
| --- | --- | --- | --- | --- | --- |
| Variant | PROVEAN | Predictiona | Variant | PROVEAN | Predictiona |
| A23V | -0.226 | Neutral | V23A | 0.146 | Neutral |
| A31G | 0.236 | Neutral | G31A | -0.060 | Neutral |
| P36E | -0.616 | Neutral | E36P | 0.493 | Neutral |
| A39R | -0.711 | Neutral | R39A | 0.598 | Neutral |
| M48I | 0.031 | Neutral | I48M | 0.029 | Neutral |
| A55T | 0.284 | Neutral | T55A | -0.169 | Neutral |
| A138S | 0.604 | Neutral | S138A | -0.603 | Neutral |
| T149A | -0.318 | Neutral | A149T | 0.324 | Neutral |
| I213L | 1.244 | Neutral | L213I | -1.244 | Neutral |
| I244M | -2.375 | Neutral | M244I | 2.375 | Neutral |

**Notes:** a. Cut-off of prediction=-2.5
